# Supplementary material for: In Vitro Fish Models for the Analysis of Ecotoxins and Temperature Increase in the Context of Global Warming
Source: MDPI journal article supplement (doi:10.3390/toxics9110286), 2021-11-01
Supplement: s1 [file s1]

# Supplementary Materials: In Vitro Fish Models for the Analysis of Exotoxins and Temperature Increase in the Context of Global Warming

Bianka Grunow, George Philipp Franz and Katrin Tönißen

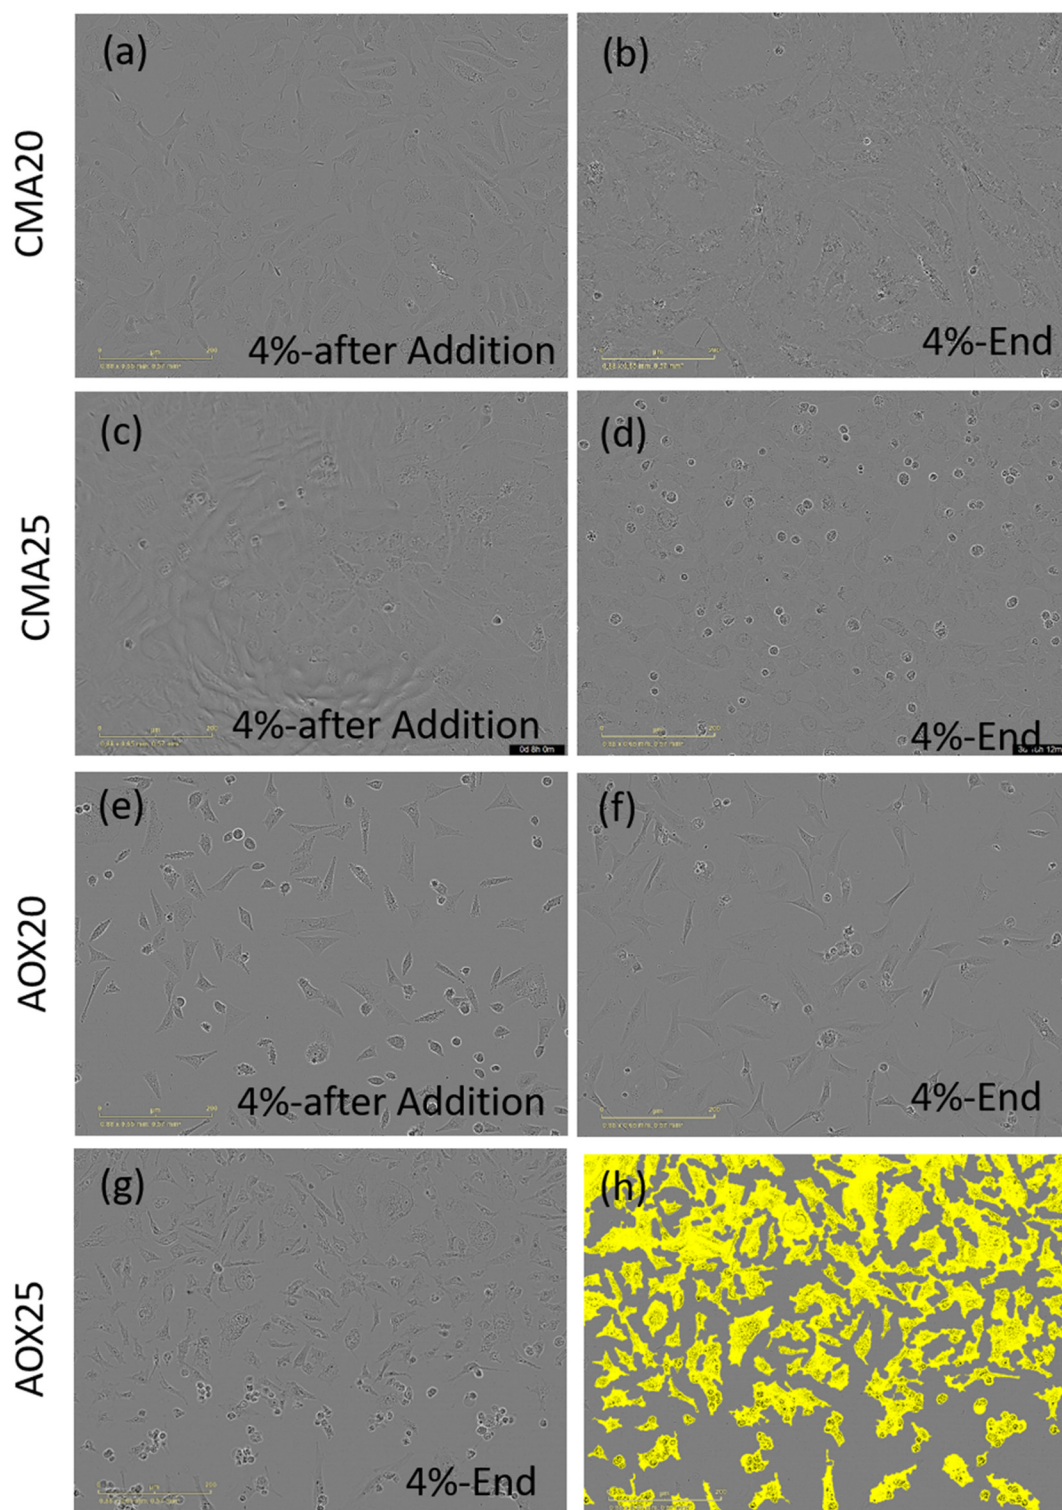

**Figure S1.** Phase contrast pictures of CMAfin1 and AOXlar7y cell cultures with 4% Ethanol supplementation directly after addition (a, c, e) and after long-term exposure (b, d, f, g) with condition 20 and 25 °C, respectively. (h) Representative picture of the overlay mask for measuring the cell confluence of the phase contrast pictures of AOX25-4% End (g). Pictures are generated by Incucyte® real-time video imaging system (Sartorius AG).

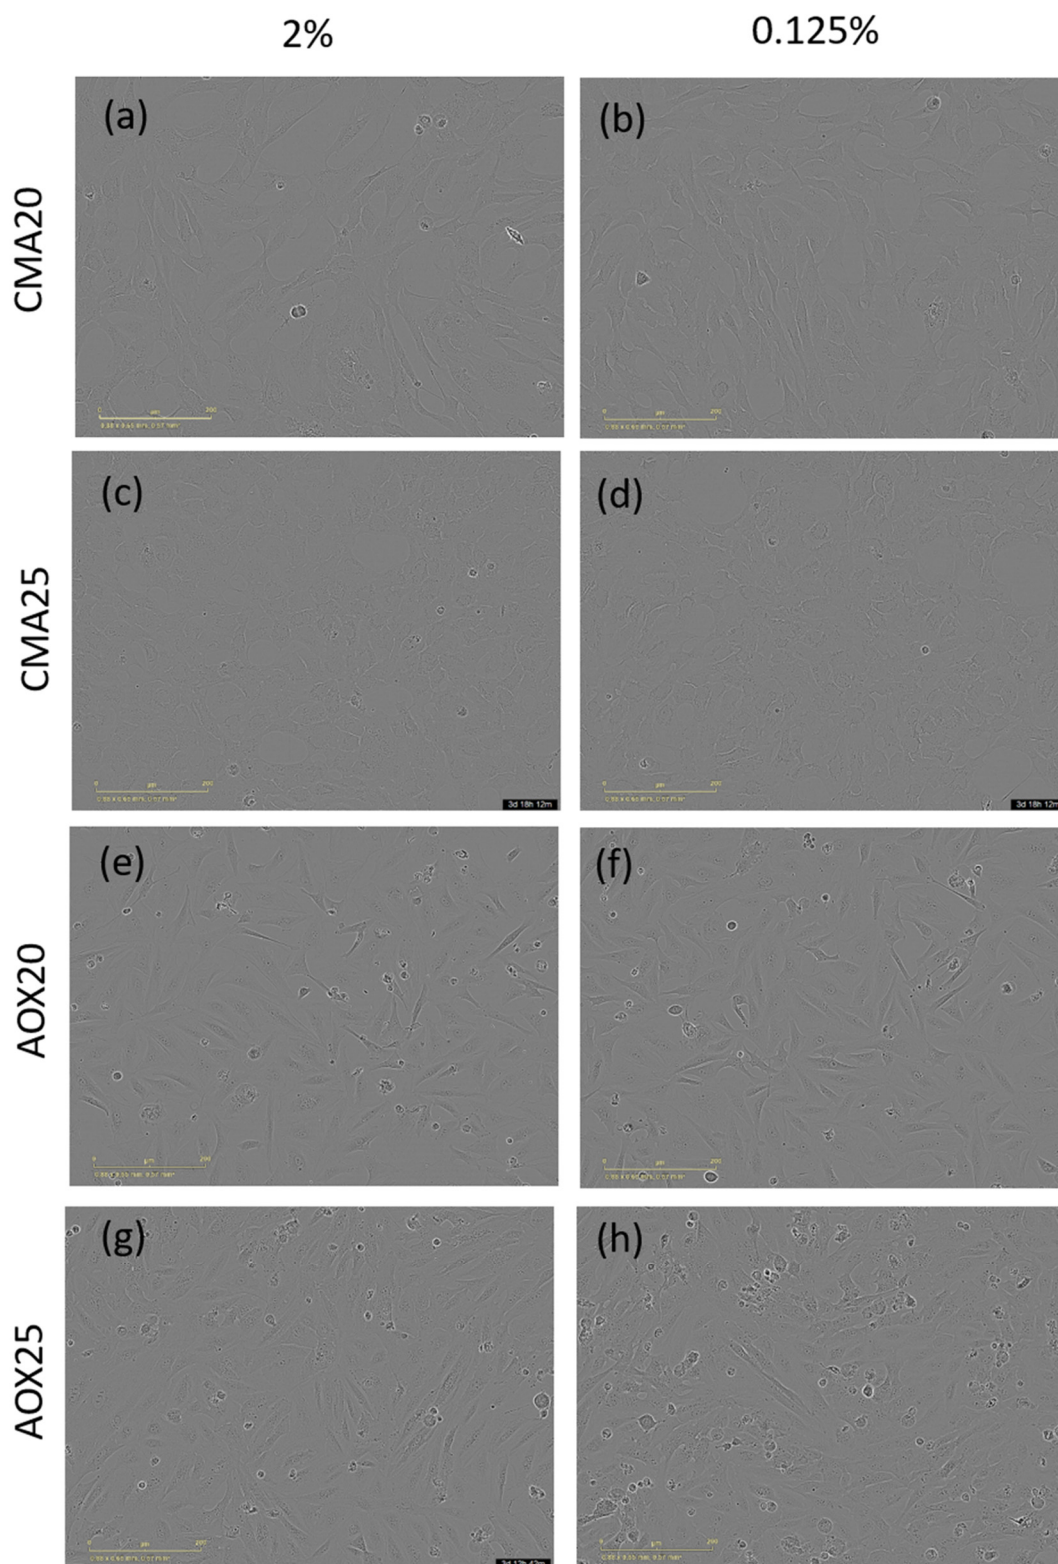

**Figure S2.** Phase contrast pictures of CMAfin1 (a–d) and AOXlar7y (e–h) cell cultures with two isopropanol supplementation (2% and 0.125%) with 20 °C (a, b, e, f) and 25 °C (c, d, g, h) condition, respectively. Pictures are generated by Incucyte® real-time video imaging system (Sartorius AG).



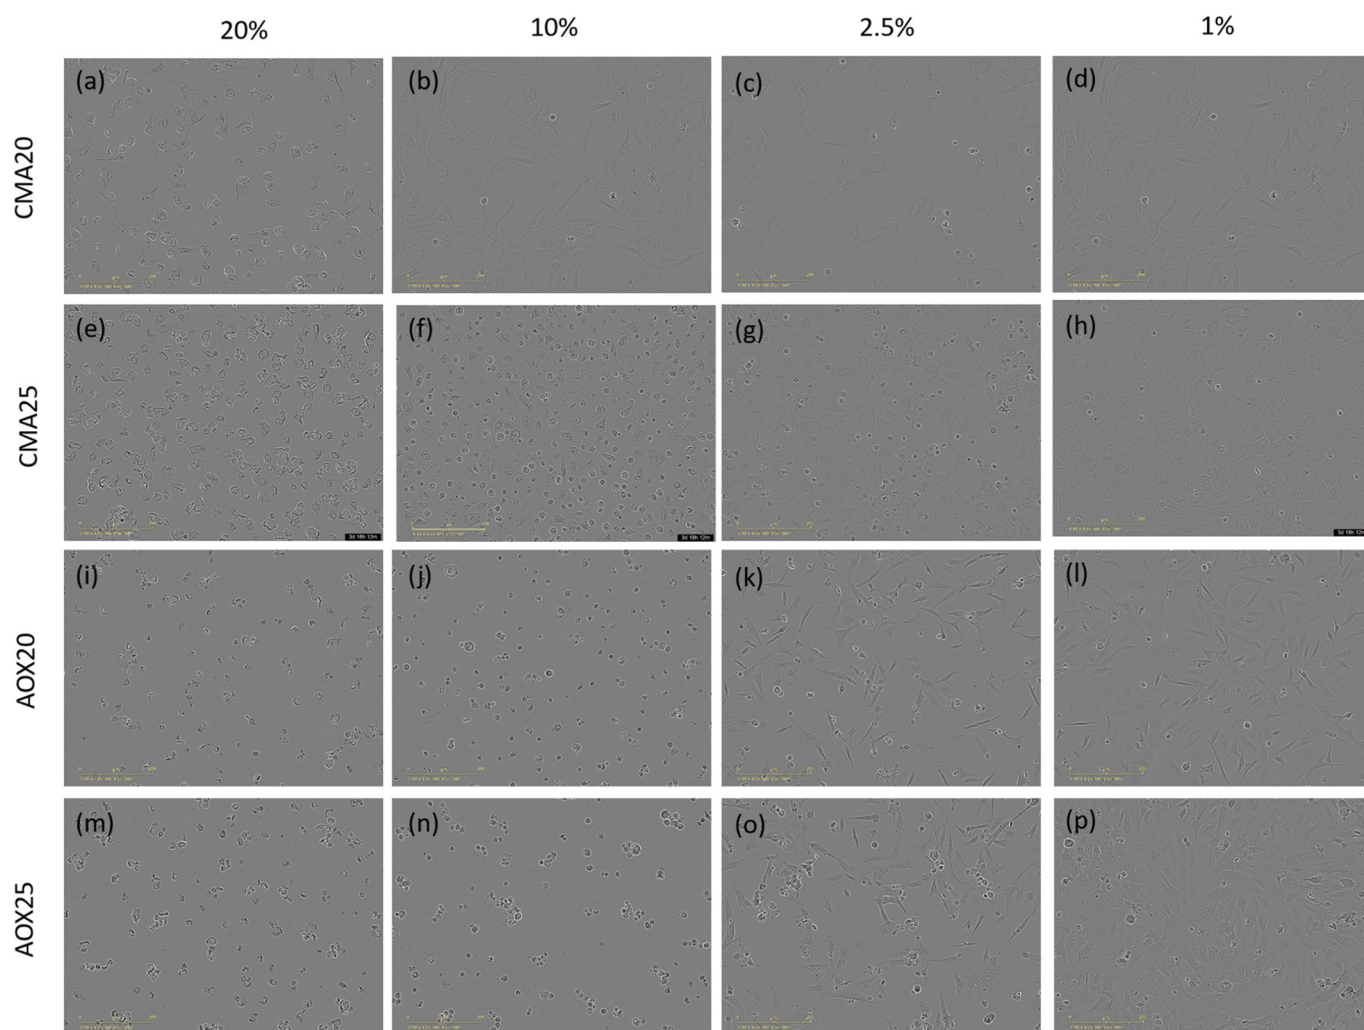

**Figure S3.** Phase contrast pictures of CMAfin1 (a–h) and AOXlar7y (i–p) cell cultures with decreasing DMSO supplementation (20%, 10%, 2.5%, 1%) with 20 °C (a–d, i–l) and 25 °C (e–h, m–p) condition, respectively. Pictures are generated by Incucyte® real-time video imaging system (Sartorius AG).
